# Supplementary material
Source: publisher figshare collection journal article supplement (https://future-science-group.figshare.com/ndownloader/files/35308804)
Supplement: Supplementary file 1 [file 35308804]

# Symptoms and impacts of nonsense mutation Duchenne muscular dystrophy (DMD) at different stages of ambulation

**DMD is a rare genetic disorder that causes progressive, irreversible muscular damage and degeneration.**

**DMD impacts patients and caregivers as the disease progresses.**

Increasing health state severity was related to decreasing physical function and independent action, such as the ability to walk, run and jump.

**Decreasing physical function and independent action impacted:**

- Individuals' ability to take part in daily and social activities, and their emotional wellbeing
- Increased levels of care and emotional burden
- Health-related quality of life (HRQoL) of individuals with nmDMD and their caregivers

Interviews were conducted with caregivers of individuals with nonsense mutation DMD (nmDMD) across three of the health states:

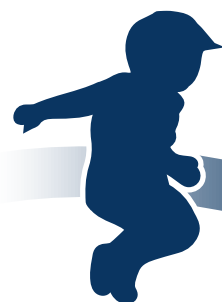

- 1 Early Ambulatory**
- Can stand from supine
  - Can walk/run 10 metres

"At the end of a school day...he'd be really exhausted, we'd be carrying him, he wouldn't really be in a state to walk...he'd be really tired, he'd be complaining that his legs were hurting"

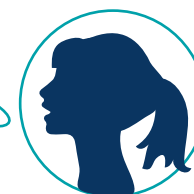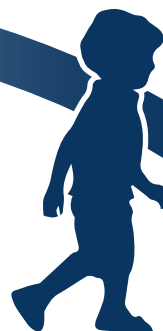

- 2 Late Ambulatory**
- Can walk/run 10 metres

"We don't go to sports day anymore...they got him involved with helping to manage it but he was still just, "This is just a big memory of what I can't do and I don't want to be here"

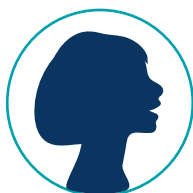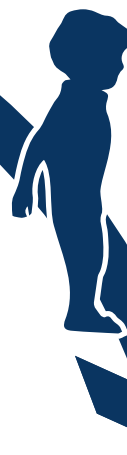

- 3 Transfers**
- Can remain standing and bear weight

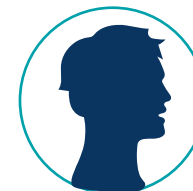

"He doesn't get up independently now"

## Authors

Kate Williams, Katharina Buesch & Sarah Acaster

## Citation

[www.futuremedicine.com/doi/10.2217/fnl-2021-0013](https://www.futuremedicine.com/doi/10.2217/fnl-2021-0013)
